# Supplementary material for: Randomized trial of intravenous iron-induced hypophosphatemia
Source: JCI journal article supplement (doi:10.1172/jci.insight.124486), 2018-12-05

## Supplemental Material

### Supplemental Figure Legends

**Supplemental Figure.** Distribution of serum phosphate levels (mg/dL) in the ferumoxytol (n=997) and ferric carboxymaltose (n=1000) treatment groups before and after intravenous iron administration.

(A) baseline, ferumoxytol; (B) post-baseline, ferumoxytol; (C) baseline, ferric carboxymaltose; (D) post-baseline, ferric carboxymaltose.

Note, that serum phosphate was left truncated due to the reference laboratory reporting values less than 0.42 mmol/L (1.32 mg/dL) as below the level of validation. We assigned a value of 0.41 mmol/L (1.27 mg/dL) to these 123 instances, all of which occurred post-baseline in the ferric carboxymaltose group.

# Baseline Serum Phosphate: Ferric Carboxymaltose (FCM)

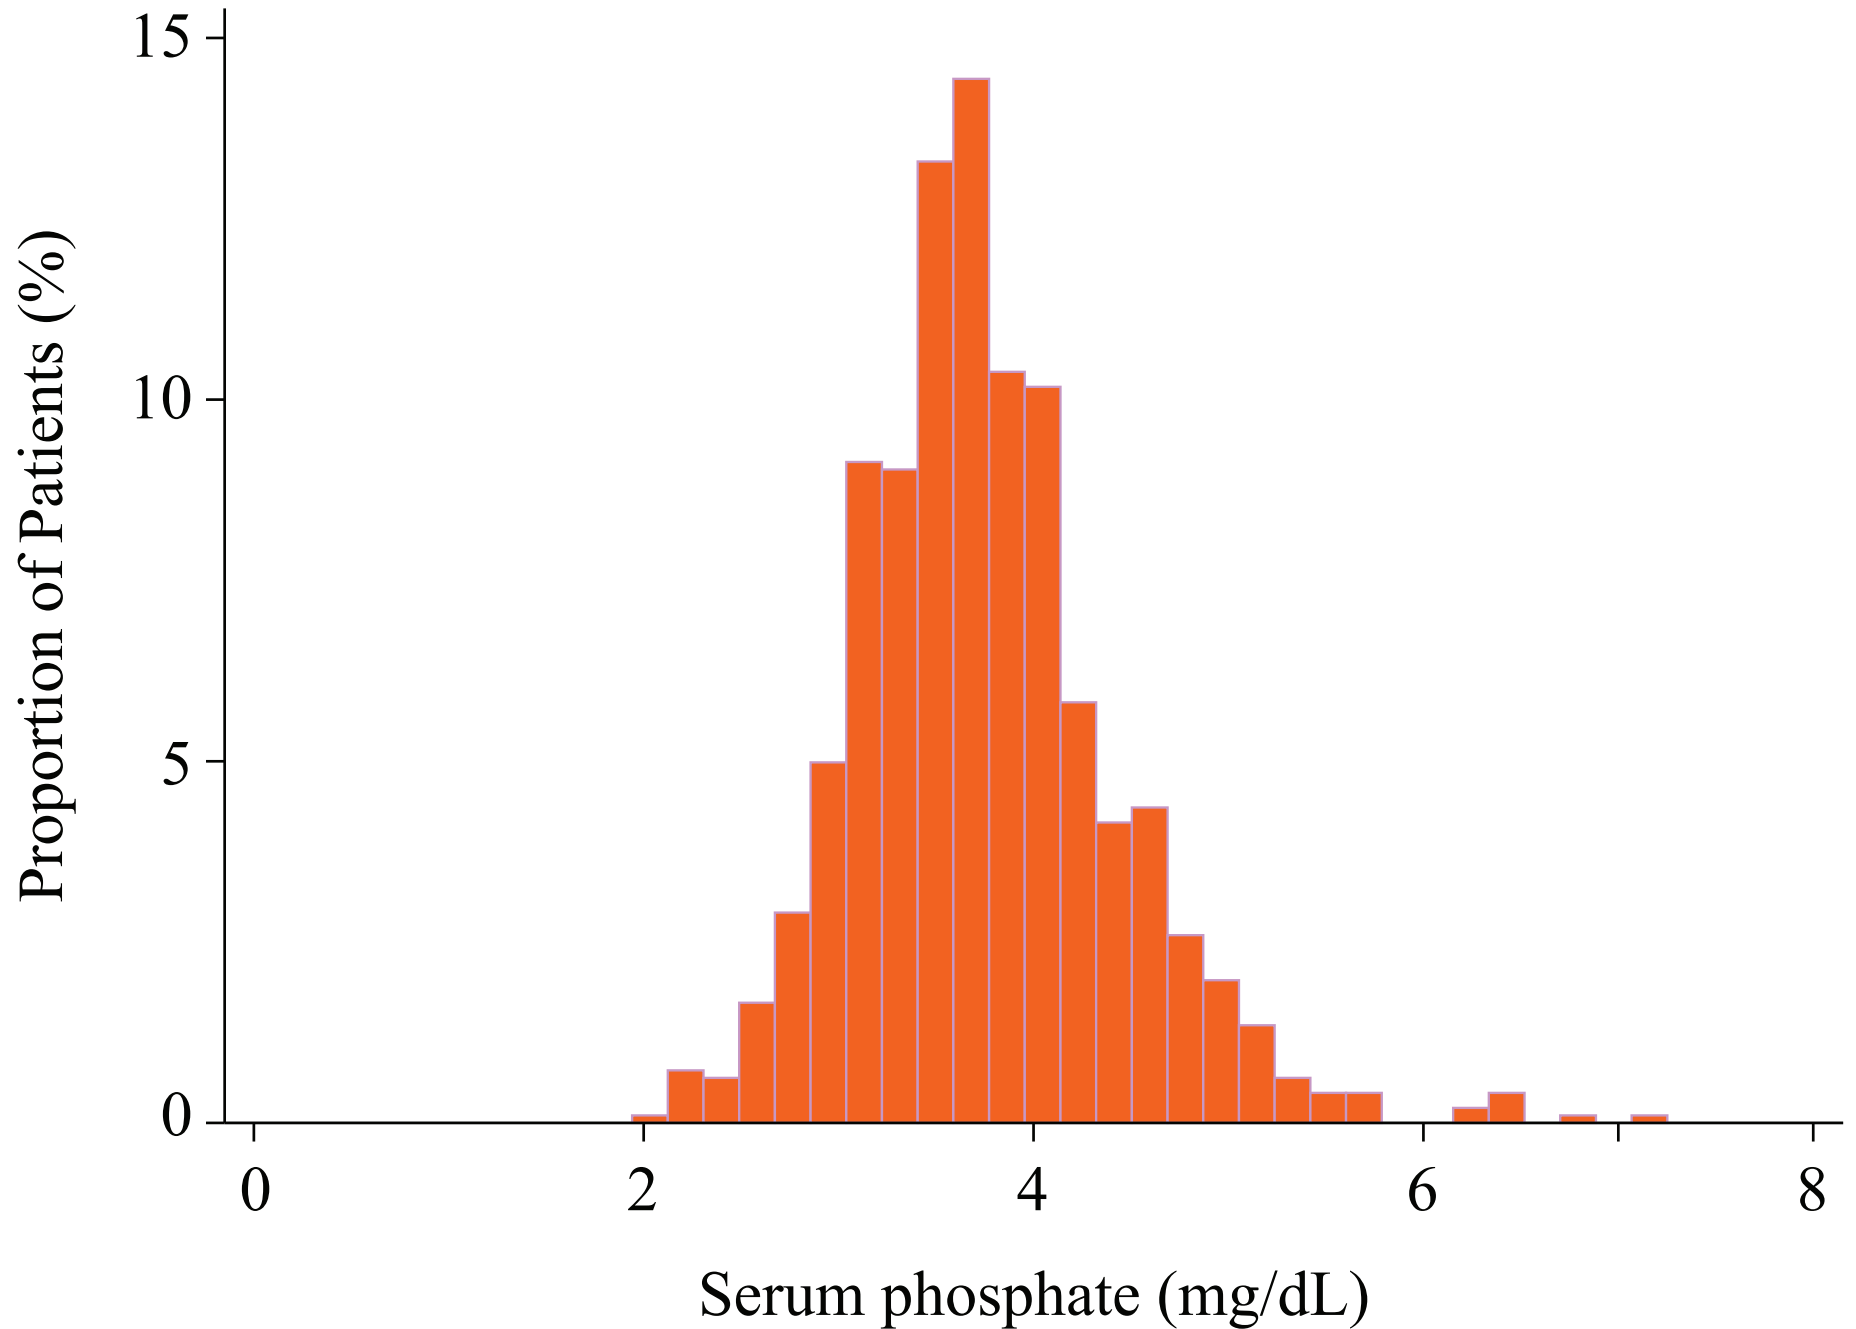

# Post Baseline Serum Phosphate: Ferric Carboxymaltose (FCM)

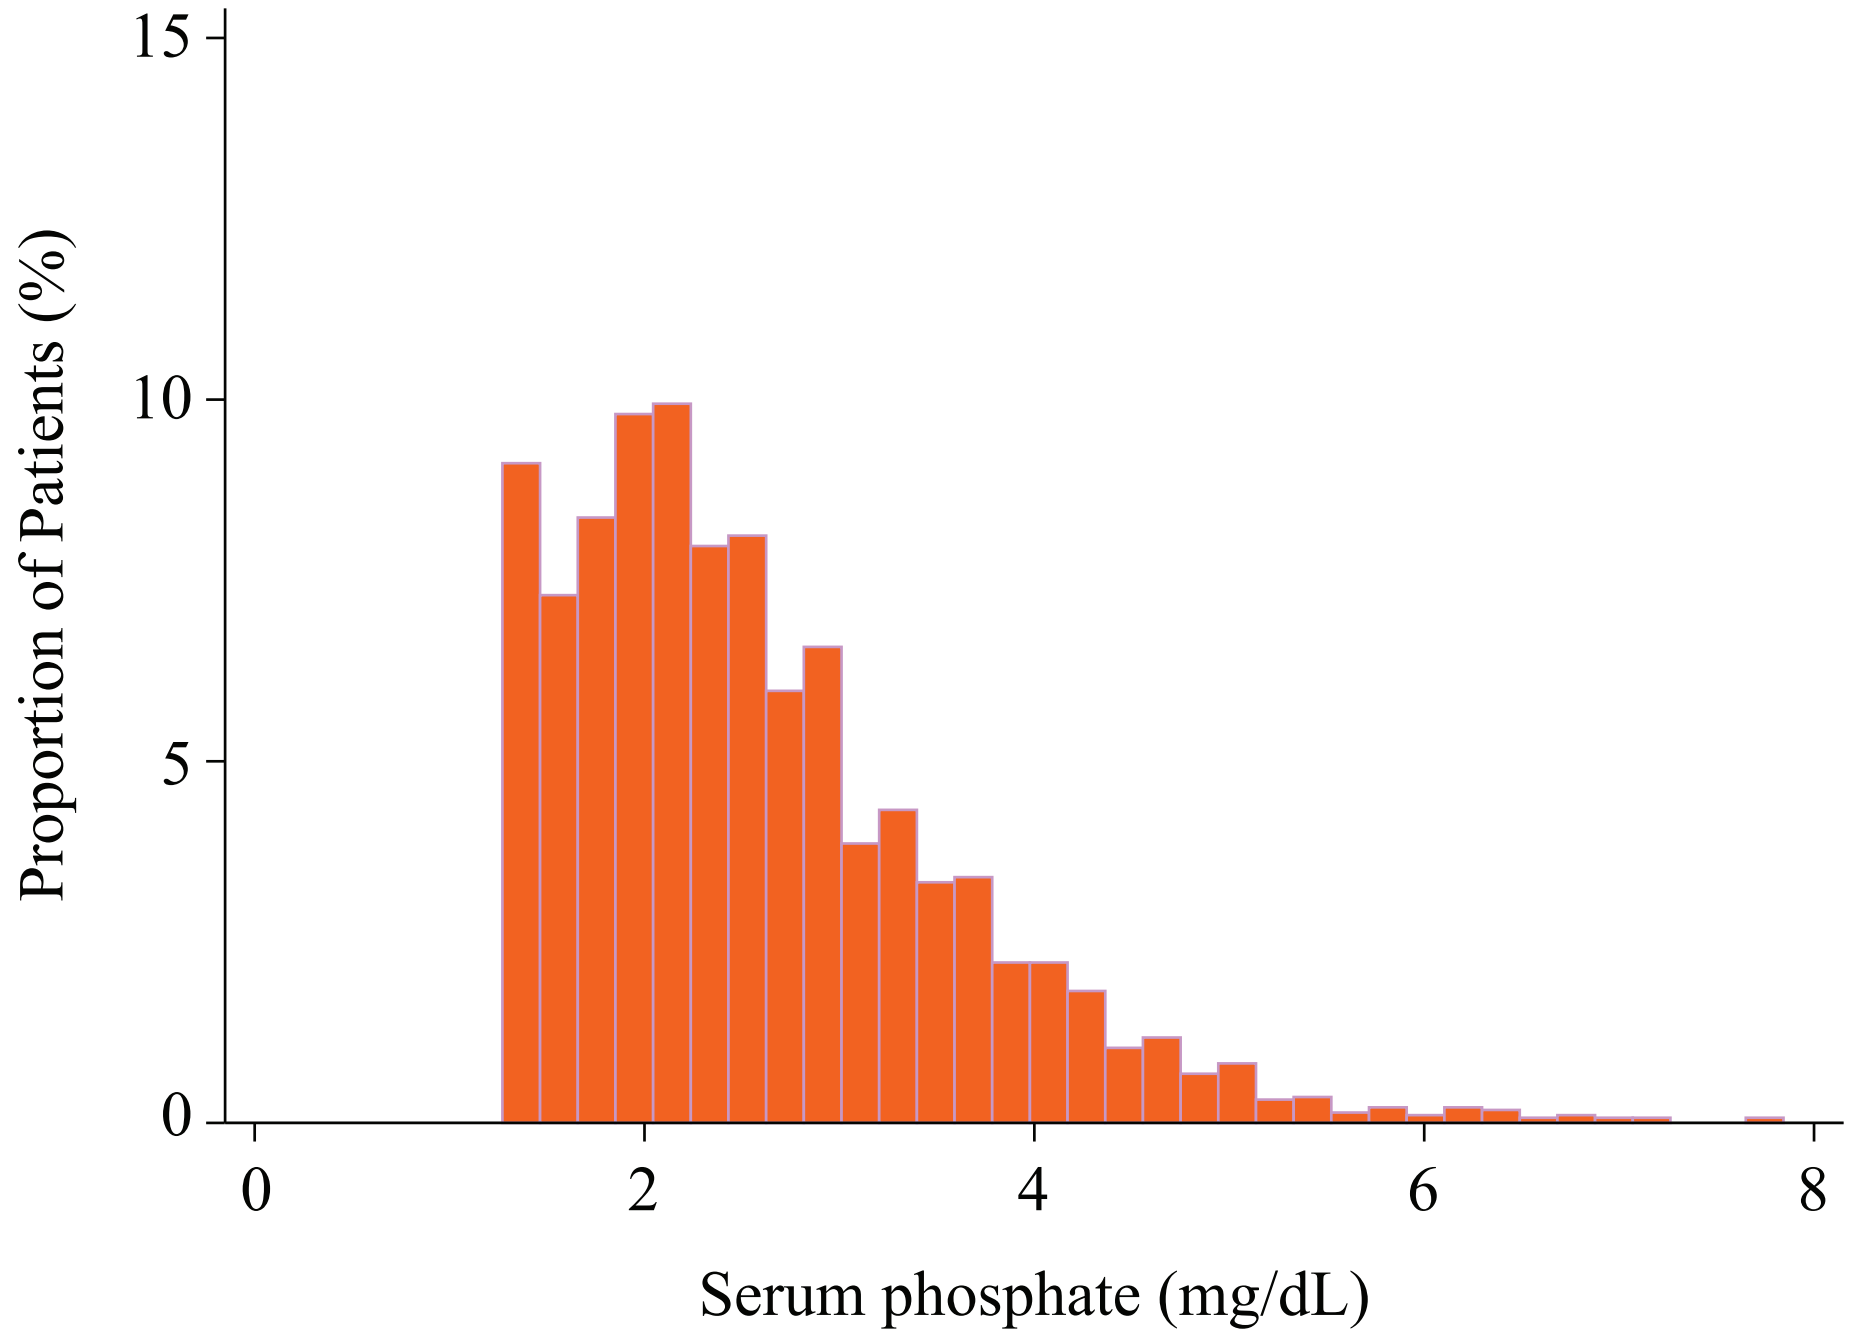

# Baseline Serum Phosphate: Ferumoxytol (FMX)

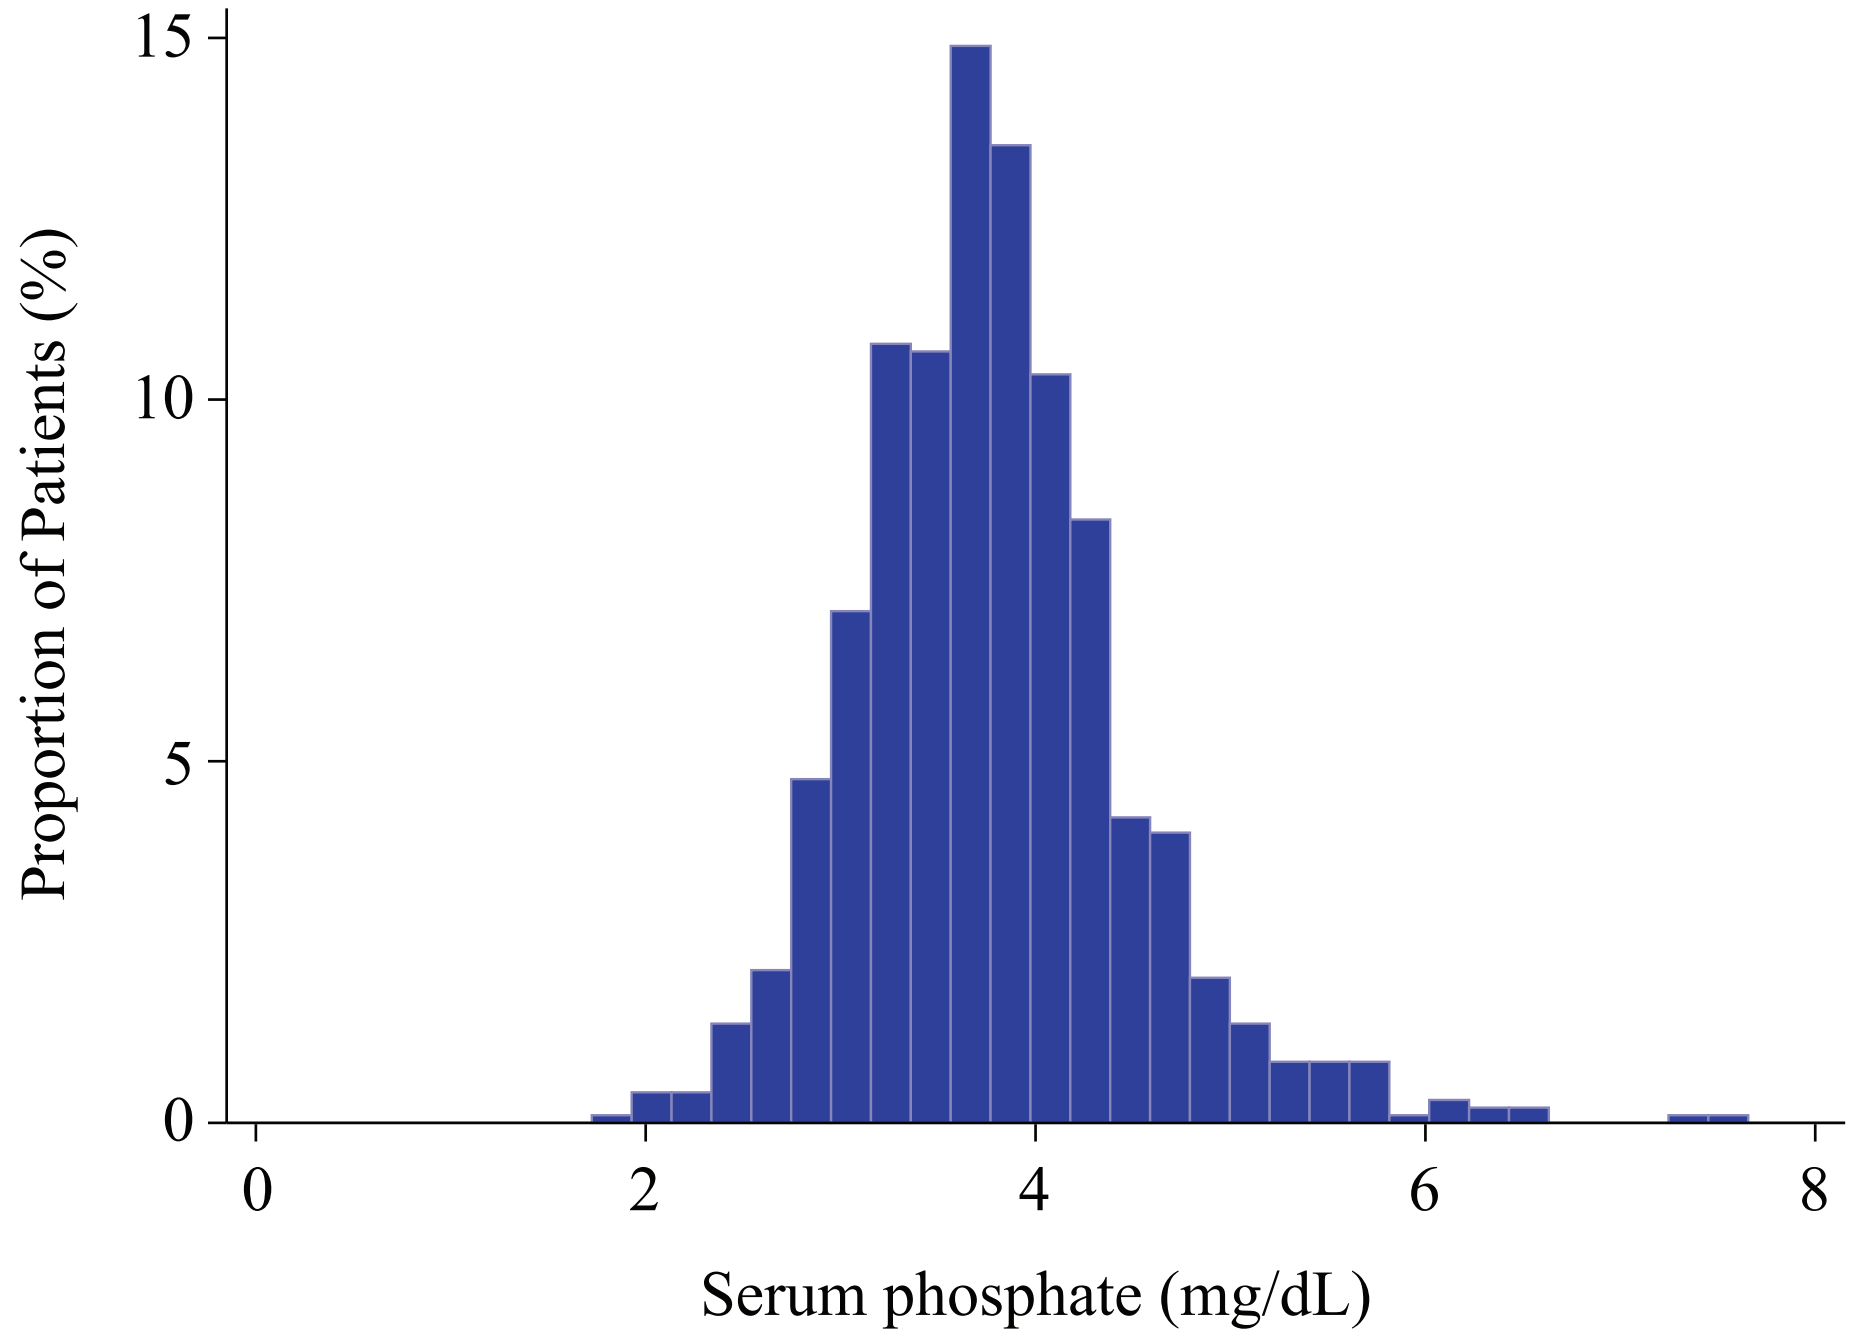

# Baseline Serum Phosphate: Ferric Carboxymaltose (FCM)

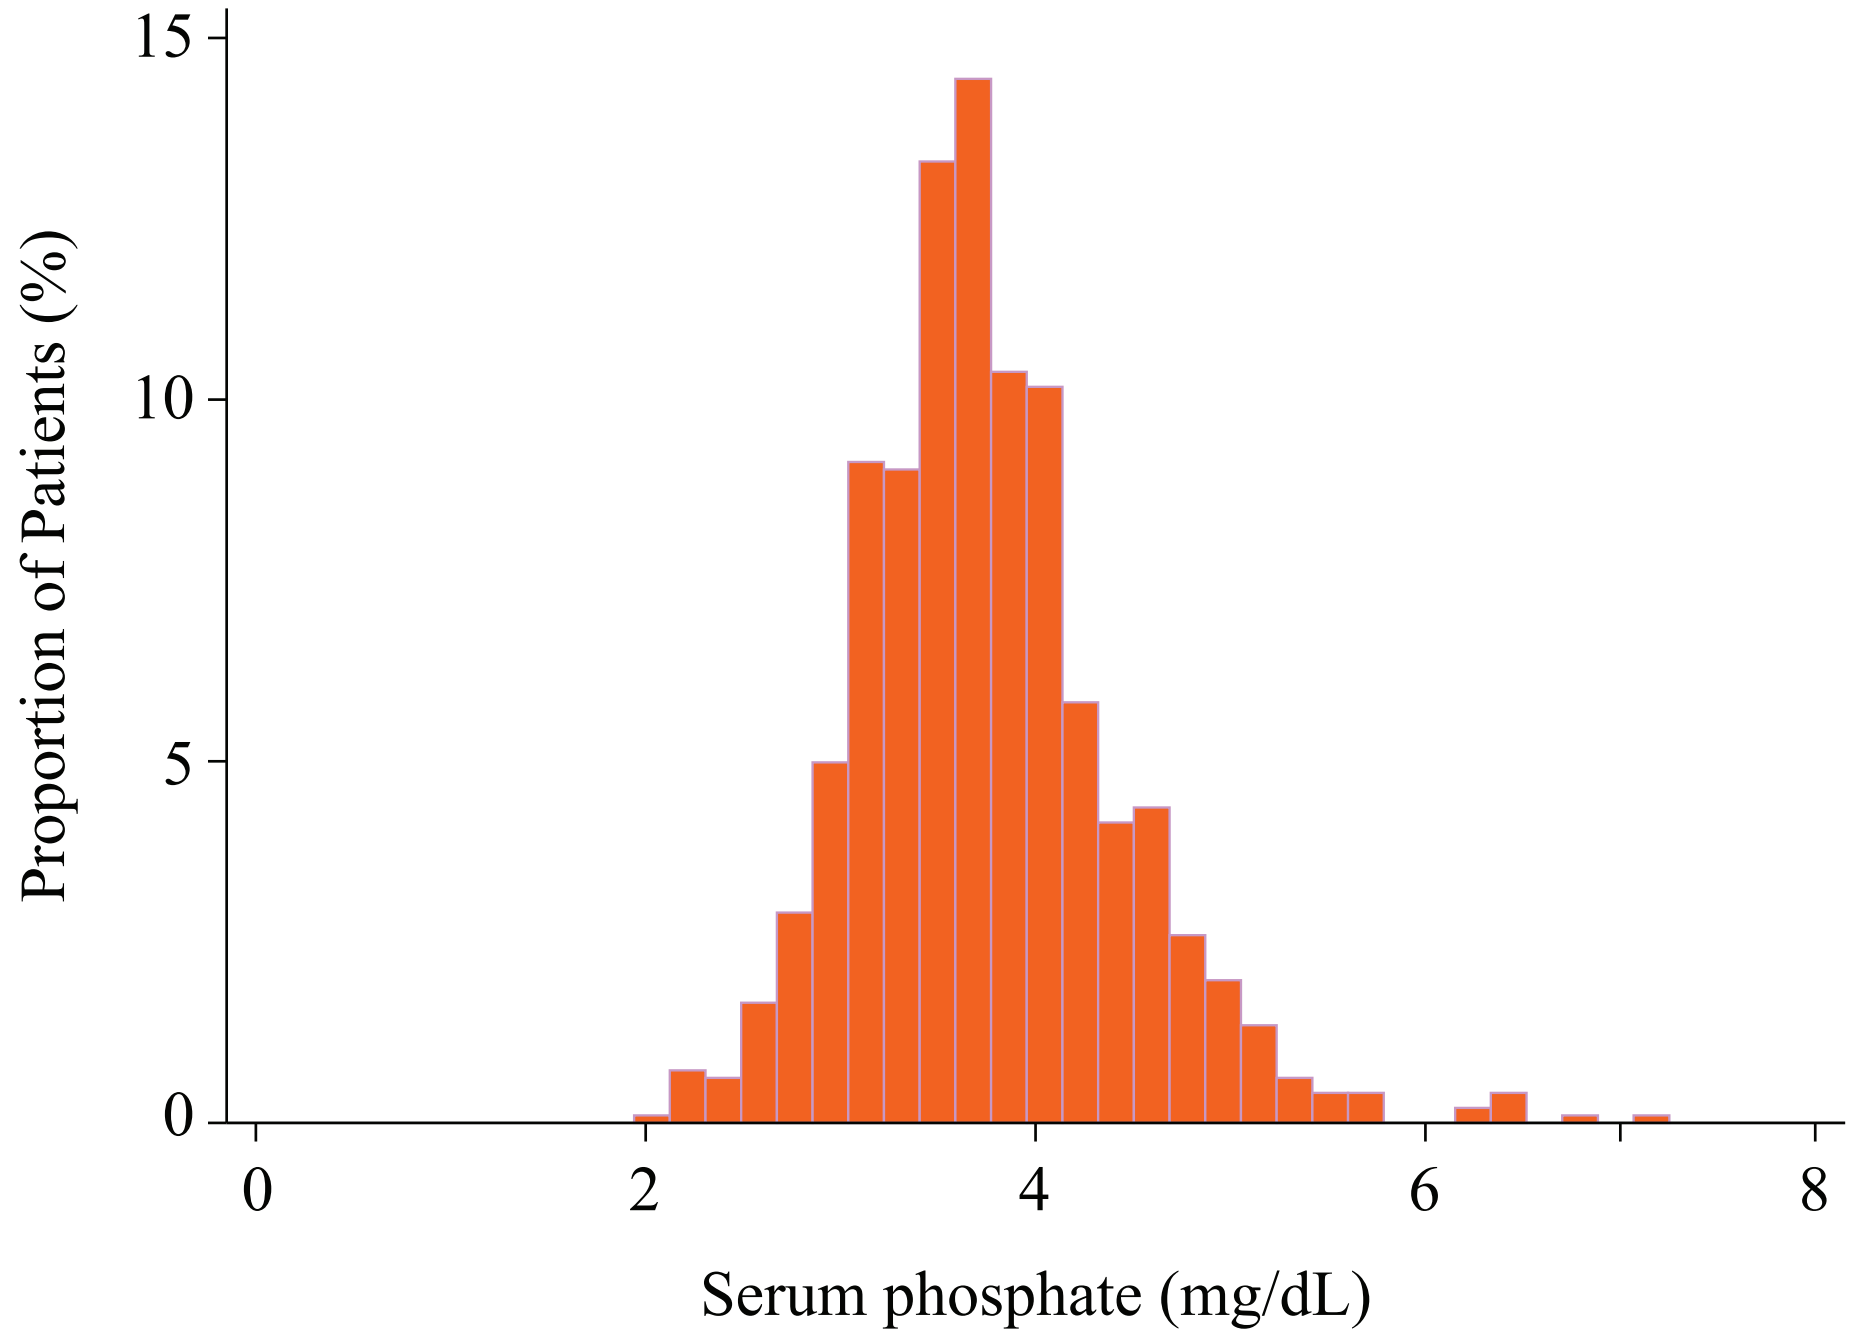

# Post Baseline Serum Phosphate: Ferric Carboxymaltose (FCM)



# Baseline Serum Phosphate: Ferumoxytol (FMX)



# Baseline Serum Phosphate: Ferumoxytol (FMX)

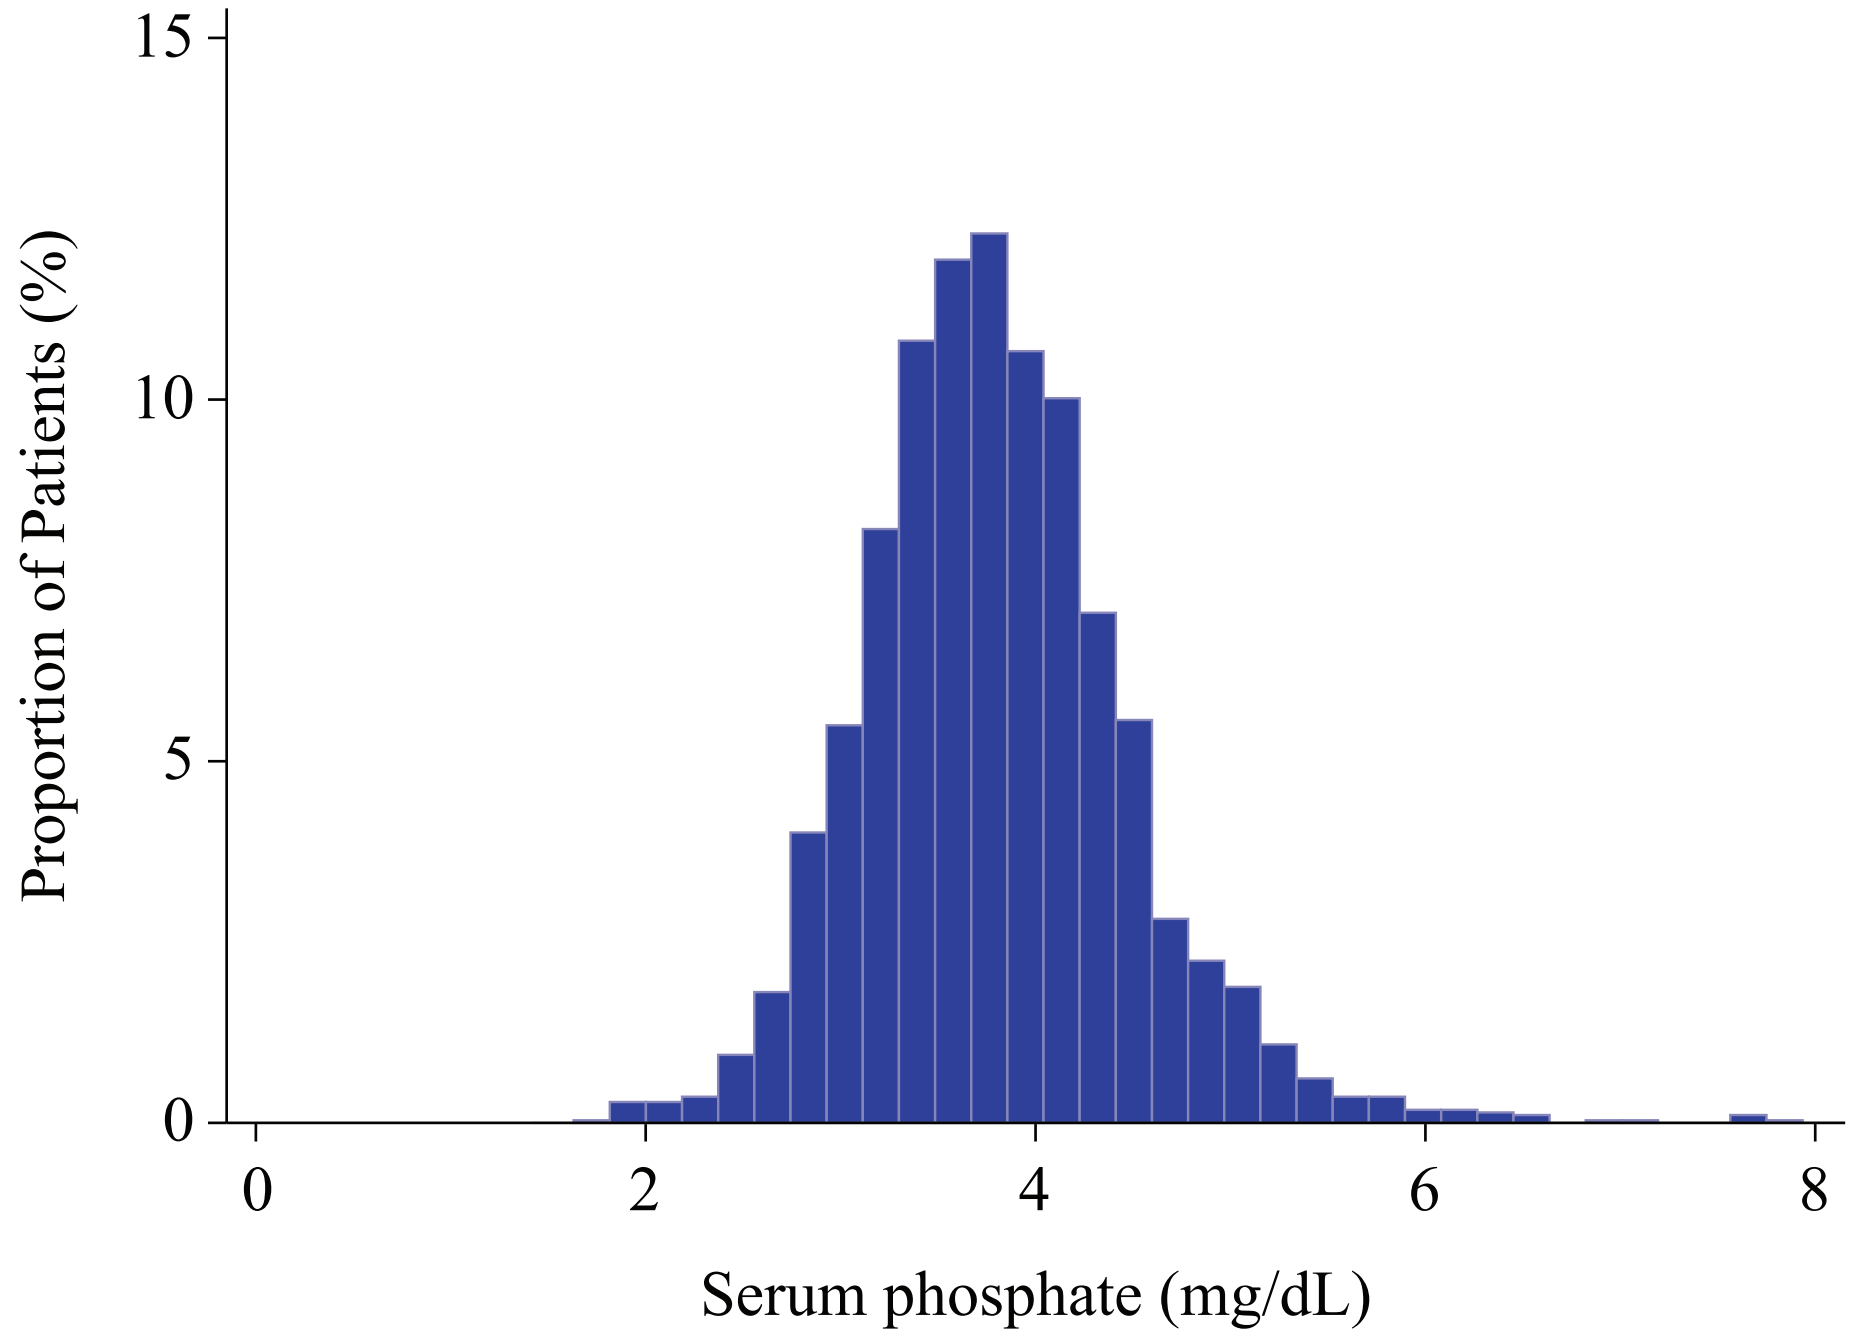

Supplement: sd1 [file 1]
